# Supplementary material
Source: PubMed Central journal article supplement (PMC6951104)
Supplement: jin-0007-0102-s01.pdf [file jin-0007-0102-s01.pdf]

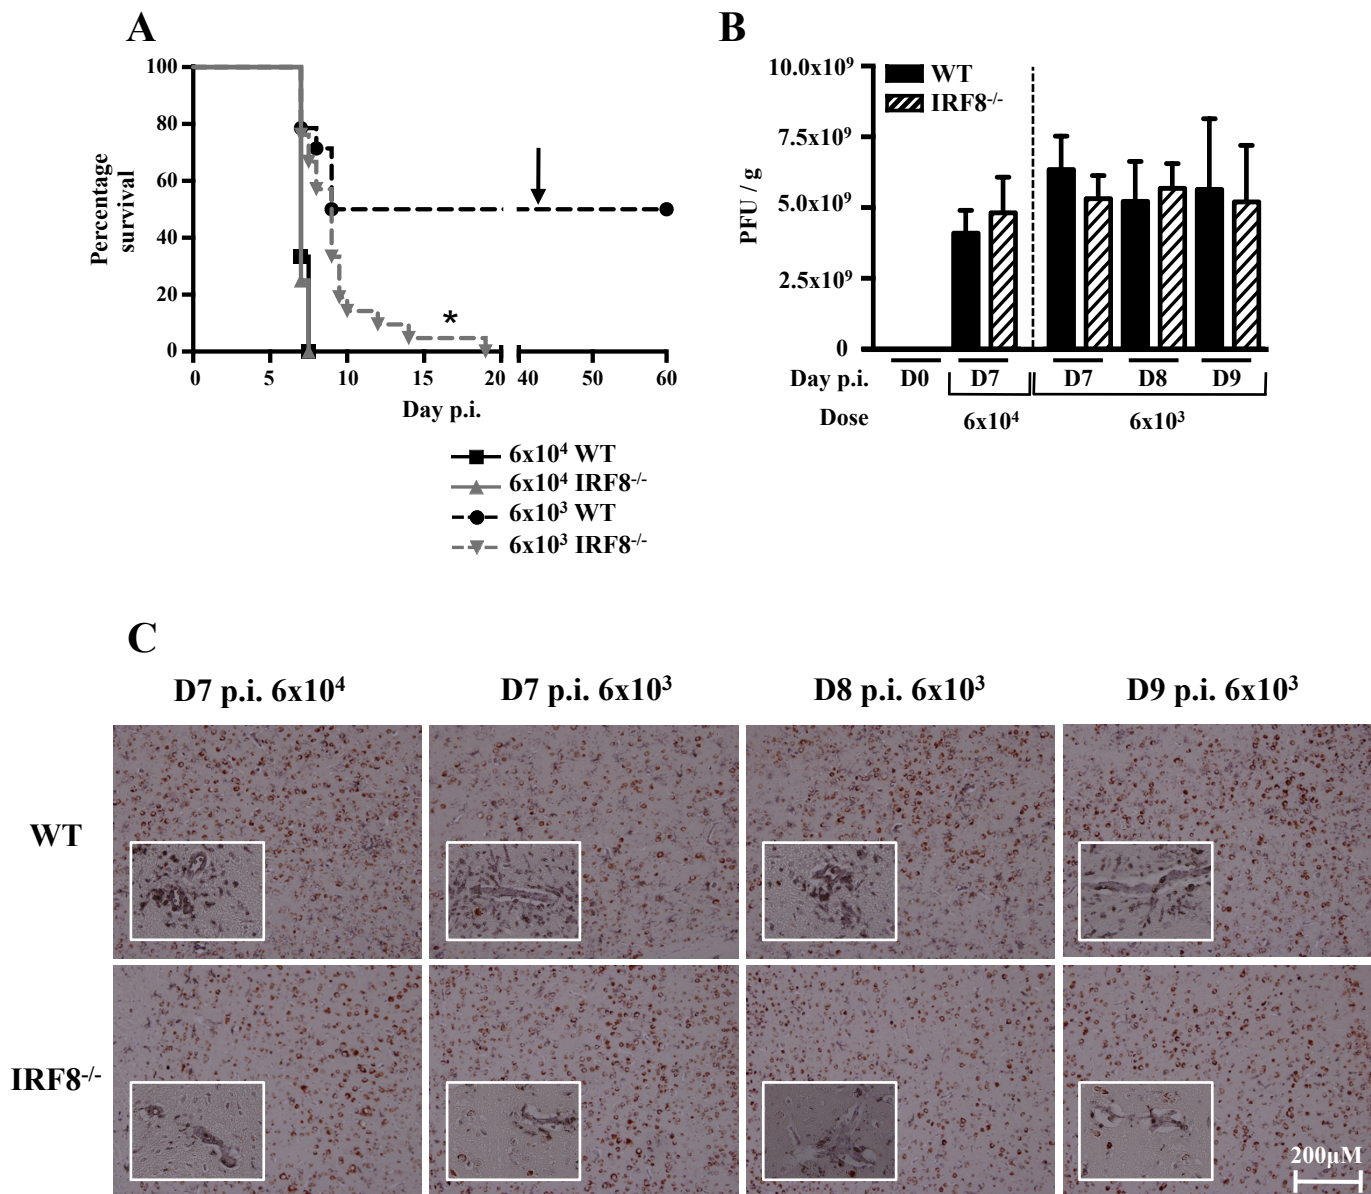

Supplementary Fig. 1.

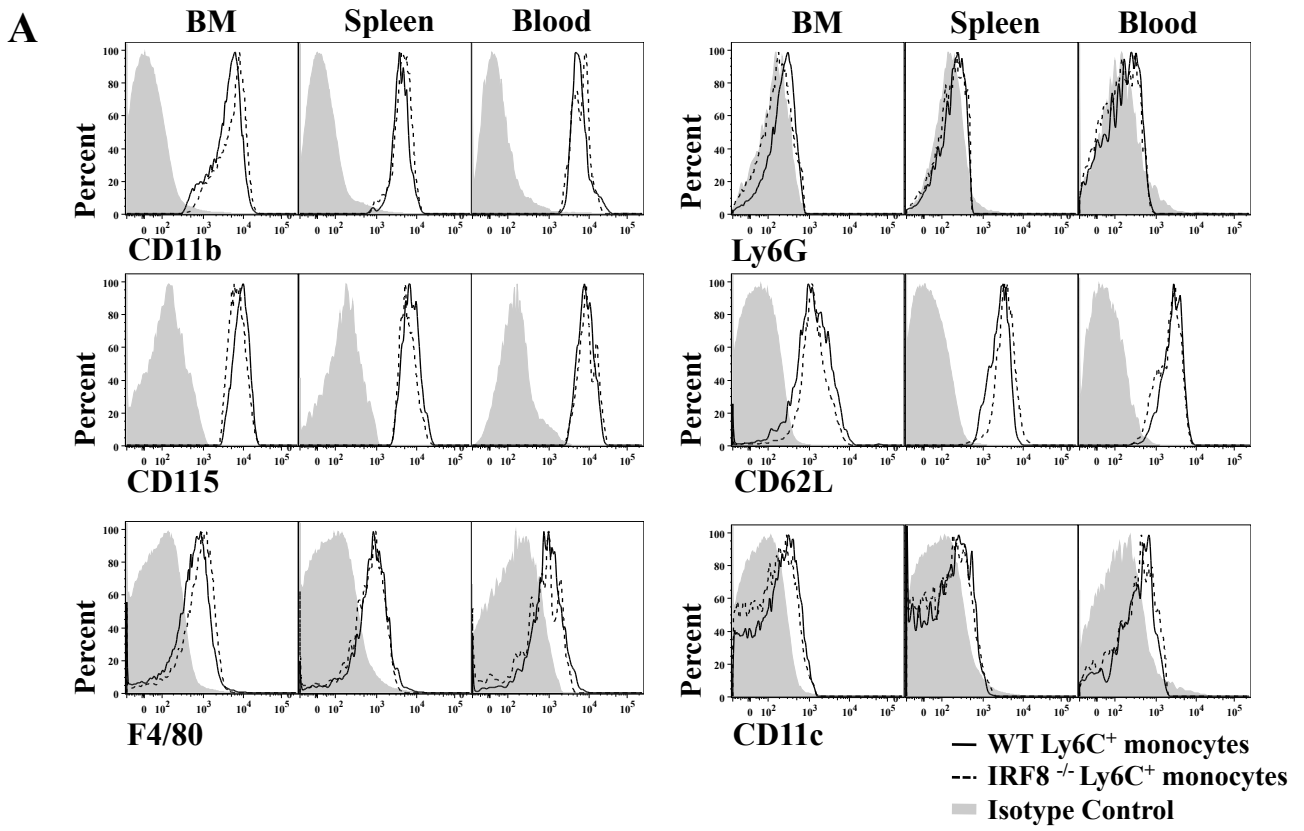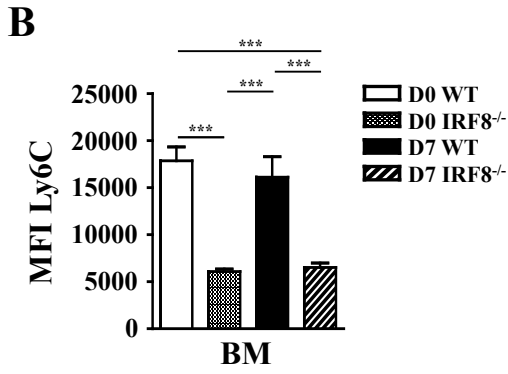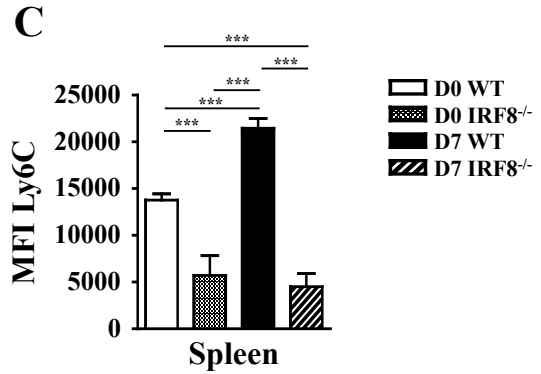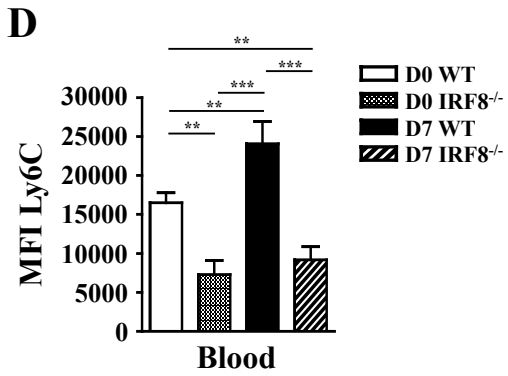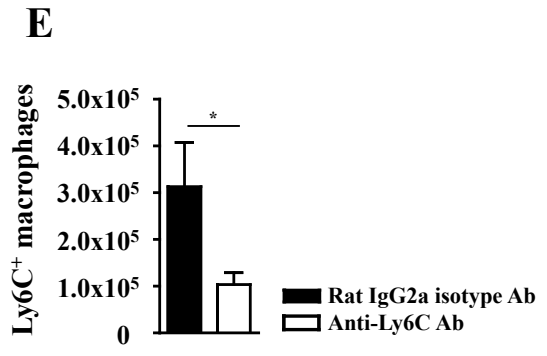

Supplementary Fig. 2.

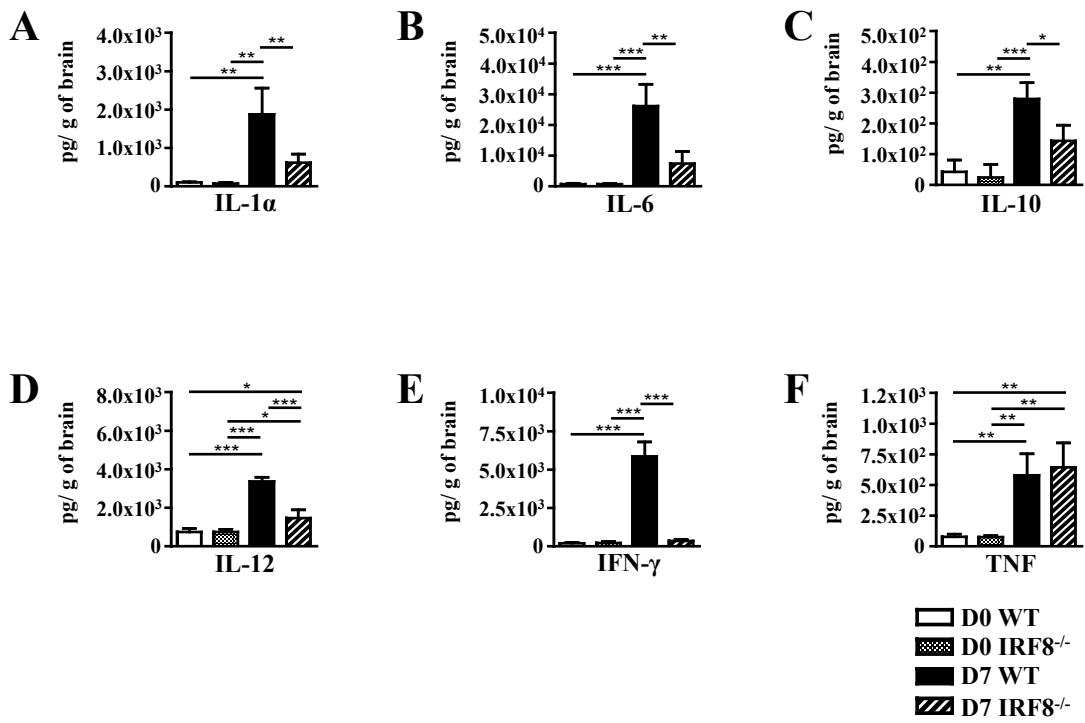

Supplementary Fig. 3.

**A**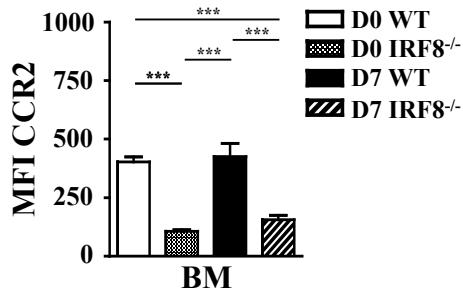**B**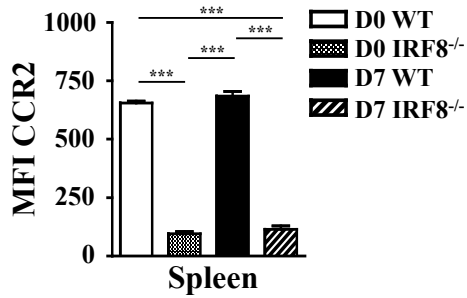**C**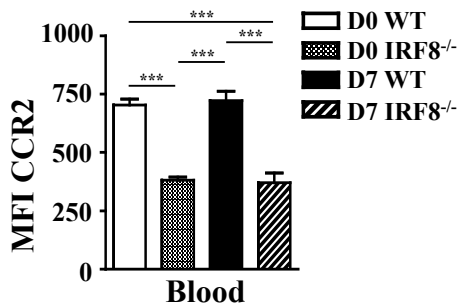**D**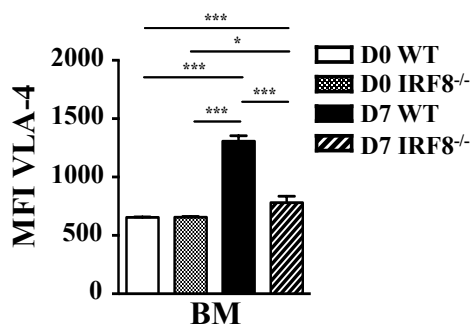**E**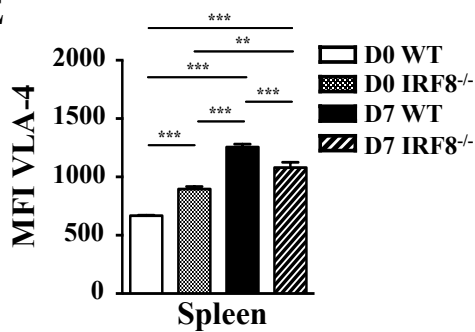**F**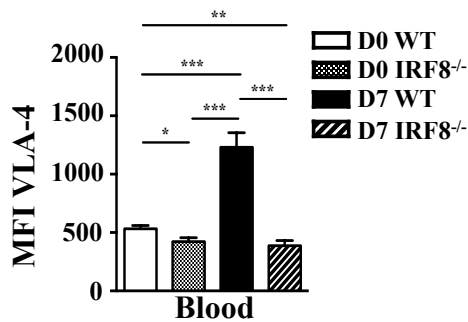

## Supplementary Figure Legends

**Supplementary Fig. 1.** IRF8<sup>-/-</sup> mice have higher mortality following low dose WNV infection. WT and IRF8<sup>-/-</sup> mice were infected intranasally with 6x10<sup>4</sup> or 6x10<sup>3</sup> PFU WNV. Surviving mice were re-inoculated with 6x10<sup>4</sup> PFU on D42 p.i. to confirm protective immunity (indicated by arrow on graph). Mortality was recorded (**A**). BHK plaque assays were performed on brains from WT and IRF8<sup>-/-</sup> mice succumbing to disease on D7-D9 p.i. following infection with 6x10<sup>4</sup> or 6x10<sup>3</sup> PFU WNV (**B**). Immunohistology for WNV NS-1 (brown) and lectin (black; myeloid cells and endothelial cells) was performed on brain sections taken from WT and IRF8<sup>-/-</sup> mice succumbing to disease on D7-D9 p.i. following infection with 6x10<sup>4</sup> or 6x10<sup>3</sup> PFU WNV (**C**). Disease courses were performed 3 times with a minimum of 6 mice/group. Statistical analysis was conducted using the Log-rank (Mantel-Cox) test and  $P \leq 0.05$  (\*) in comparing IRF8<sup>-/-</sup> mice infected with 6x10<sup>3</sup> PFU to WT animals infected at this dose. BHK plaque assay data shown are means  $\pm$  SD represent three separate experiments with a minimum of 4 mice/group. Immunohistology was performed on 4 sagittal brain sections from a minimum of 4 mice/group and was repeated twice.

**Supplementary Fig. 2.** IRF8<sup>-/-</sup> Ly6C<sup>+</sup> inflammatory monocytes express lower levels of Ly6C than WT cells. CD45<sup>+</sup> CD115<sup>+</sup> CD11b<sup>+</sup> Ly6G<sup>-</sup> Ly6C<sup>+</sup> monocytes were gated in the BM, spleen and blood and the expression of CD11b, CD115, F4/80, Ly6G, CD62L and CD11c were compared (**A**). Ly6C<sup>+</sup> monocytes were gated in the BM (**B**), spleen (**C**) and blood (**D**) and the MFI of Ly6C expression was compared. Following WNV infection, WT mice were injected i.v. with 100 $\mu$ g anti-Ly6C mAb or rat Ig2a isotype control on D5 and D6 p.i. Brains were processed on D7 p.i. and CD45<sup>+</sup> CD115<sup>+</sup> CD11b<sup>+</sup> Ly6G<sup>-</sup> Ly6C<sup>+</sup> macrophages were gated. Total numbers of macrophages were calculated using flow cytometry percentages and absolute live cells counts for each brain (**E**). Flow cytometry data shown are means  $\pm$  SD and represent three separate experiments with 4 mice/group. Statistical analysis was conducted using one-way ANOVA and Tukey-Kramer post-test.  $P \leq 0.05$  (\*),  $P \leq 0.01$  (\*\*),  $P \leq 0.001$  (\*\*\*)).

**Supplementary Fig. 3.** Significantly lower levels of proinflammatory cytokines are detected in the IRF8<sup>-/-</sup> WNV-infected brain. Brains from mock-infected and WNV-infected WT and IRF8<sup>-/-</sup> mice were collected on D7 p.i. and processed for multiplex ELISA. Levels of IL-1 $\alpha$  (**A**), IL-6 (**B**), IL-10 (**C**), IL-12 (**D**), IFN- $\gamma$  (**E**) and TNF (**F**) were compared. Multiplex ELISA data shown are means  $\pm$  SD and was performed twice with 4 mice/group. Statistical analysis was conducted using one-way ANOVA and Tukey-Kramer post-test.  $P \leq 0.05$  (\*),  $P \leq 0.01$  (\*\*),  $P \leq 0.001$  (\*\*\*)).

**Supplementary Fig. 4.** IRF8<sup>-/-</sup> monocytes express low levels of CCR2 and VLA-4. The BM (**A, D**), spleen (**B, E**) and blood (**C, F**) from mock-infected and WNV-infected WT and IRF8<sup>-/-</sup> mice were processed for flow cytometric analysis on D7 p.i. CD45<sup>+</sup> Ly6G<sup>-</sup> CD11b<sup>+</sup> CD115<sup>+</sup> Ly6C<sup>+</sup> monocytes were gated and the MFI of CCR2 (**A-C**) and VLA-4 (**D-F**) expression was compared. Flow cytometry data shown are means  $\pm$  SD and represent three separate experiments with 4 mice/group. Statistical

analysis was conducted using one-way ANOVA and Tukey-Kramer post-test.  $P \leq 0.05$  (\*),  $P \leq 0.01$  (\*\*),  $P \leq 0.001$  (\*\*\*)
